# Supplementary material for: Integrative Histologic and Bioinformatics Analysis of BIRC5/Survivin Expression in Oral Squamous Cell Carcinoma
Source: PubMed Central journal article supplement (PMC6174346; doi:10.3390/ijms19092664), 2018-09-08
Supplement: ijms-19-02664-s001.pdf [file ijms-19-02664-s001.pdf]

|                           | Cytoplasmic<br>Expression          | Nuclear<br>Expression                          | Ki-67<br>Expression                            | Grade                                          | Stage                                      | Age                                         |
|---------------------------|------------------------------------|------------------------------------------------|------------------------------------------------|------------------------------------------------|--------------------------------------------|---------------------------------------------|
| Cytoplasmic<br>Expression | $\rho = 1$<br>$p\text{-value} = 1$ | $\rho = 0.319 *$<br>$p\text{-value} = 0.001 *$ | $\rho = 0.199$<br>$p\text{-value} = 0.644$     | $\rho = 0.218 *$<br>$p\text{-value} = 0.024 *$ | $\rho = 0.072$<br>$p\text{-value} = 0.458$ | $\rho = 0.044$<br>$p\text{-value} = 0.654$  |
| Nuclear<br>Expression     |                                    | $\rho = 1$<br>$p\text{-value} = 1$             | $\rho = 0.309 *$<br>$p\text{-value} = 0.012 *$ | $\rho = 0.215 *$<br>$p\text{-value} = 0.026 *$ | $\rho = 0.064$<br>$p\text{-value} = 0.516$ | $\rho = -0.052$<br>$p\text{-value} = 0.592$ |
| Ki-67<br>expression       |                                    |                                                | $\rho = 1$<br>$p\text{-value} = 1$             | $\rho = 0.196$<br>$p\text{-value} = 0.115$     | $\rho = 0.008$<br>$p\text{-value} = 0.949$ | $\rho = 0.117$<br>$p\text{-value} = 0.35$   |
| Grade                     |                                    |                                                |                                                | $\rho = 1$<br>$p\text{-value} = 1$             | $\rho = 0.066$<br>$p\text{-value} = 0.501$ | $\rho = 0.113$<br>$p\text{-value} = 0.246$  |
| Stage                     |                                    |                                                |                                                |                                                | $\rho = 1$<br>$p\text{-value} = 1$         | $\rho = -0.120$<br>$p\text{-value} = 0.219$ |
| Age                       |                                    |                                                |                                                |                                                |                                            | $\rho = 1$<br>$p\text{-value} = 1$          |

**Supplemental Materials:** Pearson's correlation of OSCC patients in the authors' own database. For the analysis, the Nuclear and Cytoplasmic expression were categorized as high/low on the basis of a threshold of 60% percentage expression. Staging was categorized in low (S1-S2) and high (S3-S4), Grading in high (G3) and low (G1-G2), and Age in old ( $\geq 65$  years' old) and non-old ( $< 65$  years' old).

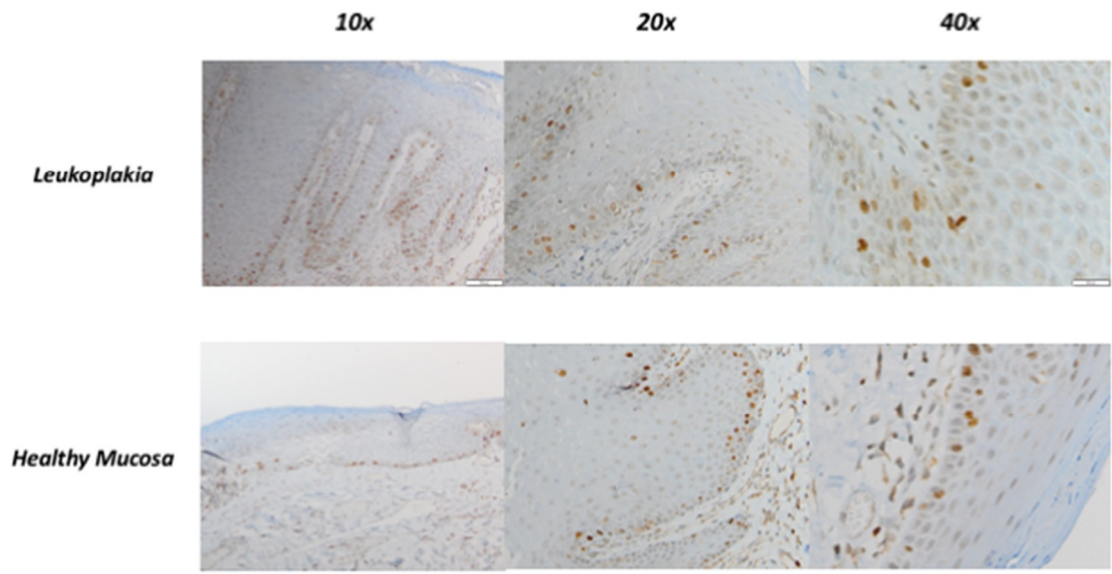

**Supplemental Materials:** Expression of Survivin in leukoplakia and healthy mucosa samples was mainly nuclear and confined in the basal third of the epithelium.

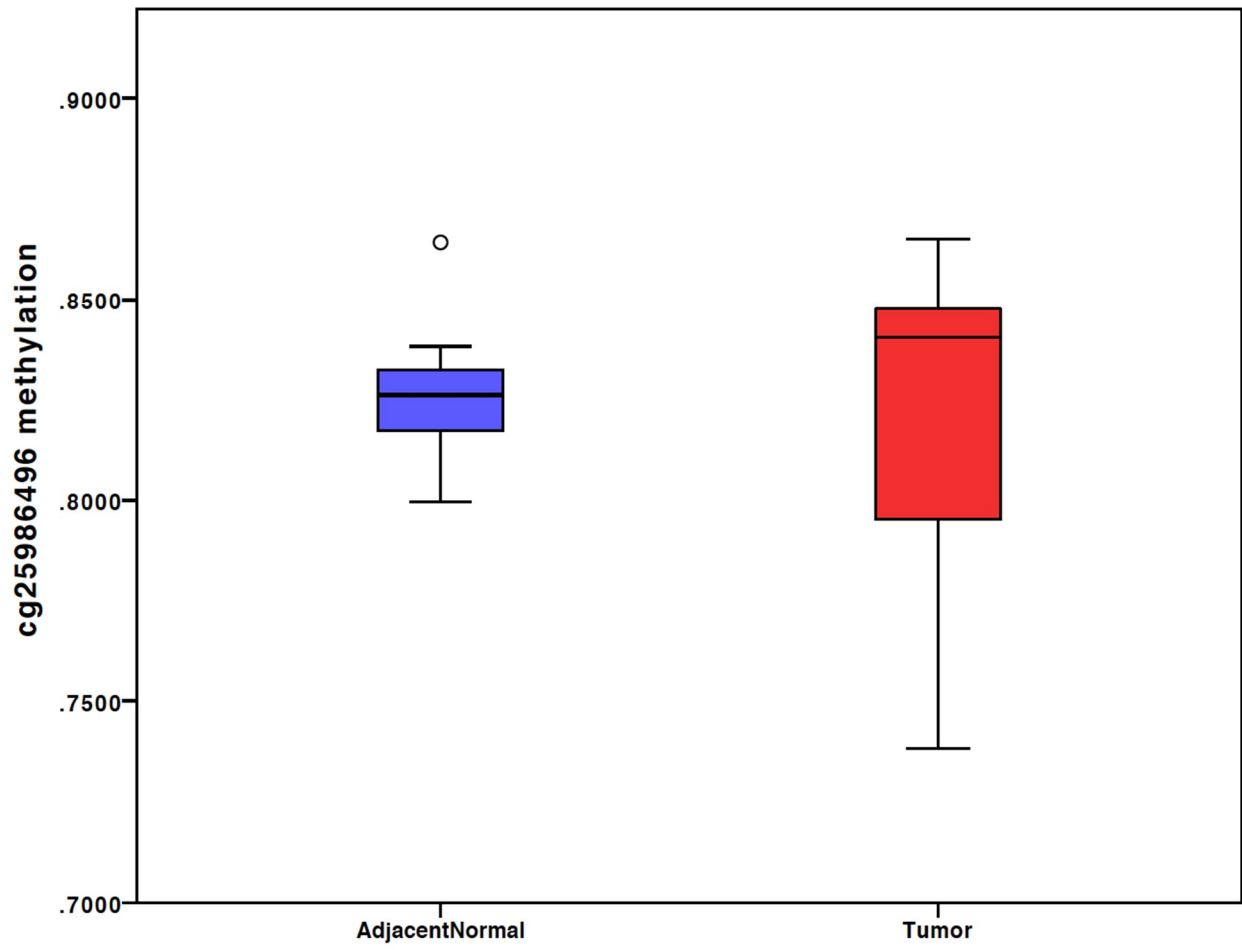

**Supplemental Materials:** Gene Expression Omnibus (GEO) analysis of methylation of the island cg25986496 in both tumor and paired adjacent normal samples.
